# *Rare Genetic Variants Underlie Outlying levels of DNA Methylation and Gene-Expression*

V. Kartik Chandru<sup>1</sup>, Riccardo E. Marioni<sup>2</sup>, James G. D. Pendergast<sup>4</sup>, Tian Lin<sup>1</sup>, Allan J. Beveridge<sup>5</sup>,  
Nicholas G. Martin<sup>6</sup>, Grant W. Montgomery<sup>1</sup>, David A. Hume<sup>7</sup>, Ian J. Deary<sup>8</sup>, Peter M. Visscher<sup>1</sup>,  
Naomi R. Wray<sup>1,8</sup>, Allan F. McRae<sup>1</sup>

1. Institute for Molecular Bioscience, The University of Queensland, Brisbane, QLD 4072, Australia
2. Centre for Genomic and Experimental Medicine, Institute of Genetics and Molecular Medicine, The University of Edinburgh, Edinburgh EH4 2XU, UK
3. The Roslin Institute, The University of Edinburgh, Midlothian EH25 9RG, UK
4. Glasgow Polyomics, Wolfson Wohl Cancer Research Centre, The University of Glasgow, Glasgow G61 1QH, UK
5. QIMR Berghofer Medical Research Institute, Brisbane, QLD 4006, Australia.
6. Mater Research Institute, The University of Queensland, Brisbane, Qld 4102, Australia
7. Queensland Brain Institute, The University of Queensland, Brisbane, QLD 4072, Australia
8. Lothian Birth Cohorts, Department of Psychology, The University of Edinburgh, Edinburgh EH8 9JZ, UK

1 **Abstract**

2       Testing the effect of rare variants on phenotypic variation is difficult due to the need for  
3 extremely large cohorts to identify associated variants given expected effect sizes. An alternative  
4 approach is to investigate the effect of rare genetic variants on low-level genomic traits, such as  
5 gene expression or DNA methylation (DNAm), as effect sizes are expected to be larger for low-level  
6 compared to higher-order complex traits. Here, we investigate DNAm in healthy ageing populations -  
7 the Lothian Birth cohorts of 1921 and 1936 and identify both transient and stable outlying DNAm  
8 levels across the genome. We find an enrichment of rare genetic variants within 1kb of DNAm sites  
9 in individuals with stable outlying DNAm, implying genetic control of this extreme variation. Using a  
10 family-based cohort, the Brisbane Systems Genetics Study, we observed increased sharing of DNAm  
11 outliers among more closely related individuals, consistent with these outliers being driven by rare  
12 genetic variation. We demonstrated that outlying DNAm levels have a functional consequence on  
13 gene expression levels, with extreme levels of DNAm being associated with gene expression levels  
14 towards the tails of the population distribution. Overall, this study demonstrates the role of rare  
15 variants in the phenotypic variation of low-level genomic traits, and the effect of extreme levels of  
16 DNAm on gene expression.

## 17 Introduction

18 DNA methylation (DNAm) is involved in the regulation of gene expression [1-3], as well as  
19 genomic imprinting [4], X-chromosome inactivation [5], and the maintenance of genomic stability  
20 during mitosis and cell differentiation [6-8]. Variation in DNAm has been associated with many  
21 diseases, in particular cancers [9, 10], but also common disease [11] such as Parkinson's disease [12],  
22 and rheumatoid arthritis [13]. Both genetic [14, 15] and environmental [16-18] factors are highly  
23 influential to the variation in DNAm levels across the genome. Studying the genetic architecture of  
24 DNAm can help us to understand the genetic control of DNAm and potential mechanisms through  
25 which genetic variants can affect complex traits via effects on DNAm.

26 Variation in DNAm levels is known to be under partial genetic control; a family based study  
27 estimated the average heritability of DNAm levels to be  $\overline{h^2} \sim 19\%$  [15], whilst another study  
28 estimated the average SNP-based heritability to be  $\overline{h_{SNP}^2} \sim 21\%$  [19]. DNA methylation quantitative  
29 trait loci (mQTL) analyses have discovered many associations between common genetic variants and  
30 DNAm levels across the genome [14, 19-22]. Regional control of DNAm has been observed in regions  
31 of up to 3kb, through shared mQTL and correlations between DNAm levels across the region [14,  
32 23], while a Bayesian co-localisation study found evidence for a shared genetic effect between  
33  $\sim 282,000$  pairs of CpG-sites at a median distance of  $\sim 110$ kb [22]. Overlap between mQTL and gene  
34 expression QTL (eQTL) has also been observed [14, 21], with genetic variants found to affect DNAm  
35 and gene expression levels pleiotropically [22, 24]. These observations point towards a possible  
36 mechanism through which genetic variants can alter gene expression levels via underlying  
37 differences in DNAm levels in a region.

38 Rare genetic variation has been shown to be important in the genetic architecture of complex  
39 traits, and gene expression [25-28]. Difficulties in studying the effect of rare variants reflect lack of  
40 power in traditional genome-wide association studies (GWAS) [29, 30]. Very large sample sizes are  
41 needed to detect statistically significant associations with rare variants given empirical estimated

42 effect sizes. Various statistical methods have been developed to detect rare variant associations,  
43 gaining power by aggregating the effects of multiple rare variants, or looking for unusual variances in  
44 the effect sizes of rare variants in a region [31-37]. Using one of these rare variant association tests,  
45 there has been evidence of effects from rare variants on DNAm levels, even when there is no  
46 common variant association at the relevant CpG-site [38]. Rare variants have also been found to be  
47 enriched near the transcription start site (TSS) of genes in individuals with outlying levels of gene  
48 expression, particularly in those individuals with outlying levels of gene expression across multiple  
49 tissue types [27]. Other studies have found that the number of rare alleles within a region of the TSS  
50 of genes is on average higher in those individuals with lower, or higher levels of methylation than  
51 the population average, in both humans [39] and maize [40]. These rare variants are likely to be in  
52 promoter regions; hence, it is possible that they affect the DNAm levels in CpG-islands, which can  
53 have an effect on the gene expression levels [1, 41].

54 In this study, we investigate the effect of rare genetic variation on DNAm levels across the  
55 genome, and how DNAm levels may affect gene expression levels at nearby genes. We hypothesise  
56 that, similar to the association found between rare variants and outlying gene expression levels [27,  
57 39, 40], there are associations between rare variants and outlying levels of DNAm. Outliers in DNAm  
58 have been associated with common diseases such as motor neurone disease [42] and type I diabetes  
59 [43], understanding the underlying mechanisms may help in determining the genetic etiology of  
60 these associations. In addition, CpG-sites are known to be highly mutable, with the mutation rate at  
61 CpG-sites estimated to be one order of magnitude higher than anywhere else in the genome, which  
62 results in an enrichment of mutations at CpG-sites in the genome [44, 45]. Knowing how mutations  
63 at CpG-sites will affect DNAm and gene expression levels in the genome may also be important for  
64 understanding the genetic etiology of complex trait diseases and cancers.

## 65 Results

66

67 An overview of the methods used in this study, with the different data available to us is given in  
68 Figure 1.

### 69 Detecting genome-wide genetic effects on DNA methylation

70 Using whole genome sequencing data and DNA methylation measures from the Illumina  
71 Infinium HumanMethylation450 array for  $n=1,261$  individuals from the Lothian Birth Cohorts (LBC) of  
72 1921 and 1936 [46], we tested for global effects of both rare and common genetic variants on DNAm  
73 levels across the genome. At each of the  $\sim 460,000$  DNAm probes, individuals were ranked from  
74 lowest DNAm level to the highest, and the number of minor alleles within 1kb of the CpG-site were  
75 counted for each individual within a given minor allele frequency range. We then averaged the  
76 minor allele counts for each rank at each DNAm probe. If there is no genetic effect on DNA  
77 methylation for single nucleotide polymorphisms (SNPs) with a given allele frequency range, we  
78 would expect no relationship between the average minor allele count across ranks. We observe an  
79 inflation in allele counts at the lowest and highest ranks, for all MAF ranges (Figure 2), suggesting  
80 genetic effects from variants across all MAF ranges.

81 For the common variants ( $MAF > 0.1$ ), we show that these effects are largely captured by mQTL  
82 analyses (Figure 3) by separating the  $\sim 50,000$  probes with a significant mQTL detected in previous  
83 studies [20]. The inflation at the ends of the distribution remains for the DNAm probes with a known  
84 mQTL, while the majority of the inflation is removed for the remaining probes. This indicates that  
85 the majority of the relationship between methylation rank and SNPs for common variants is  
86 captured by known mQTL.

87 We also observe that the association between minor allele counts and methylation rank is not  
88 symmetrical, with the lowest ranks having a larger inflation than the highest ranks in the MAF bins.

89 This observation suggests a bias towards SNP minor alleles decreasing DNAm levels across the  
90 genome. However, after separating the probes which contain a SNP at the CpG-site (CpG-SNP) from  
91 the rest of the probes, we see that the inflations are symmetrical for probes which do not contain a  
92 CpG-SNP (Figure 4). This suggests that the allele disrupting the CpG site is, on average, the minor  
93 allele, which may be attributed to a combination of bias in selection of CpG sites included on the  
94 array (sites which are generally CpGs were chosen), and a known mutational bias in the genome  
95 from (methylated) cytosine to thymine through the process of deamination [44]. We have shown  
96 that the effect of SNPs outside of the CpG-sites are approximately equally likely to increase or  
97 decrease DNAm levels (Figure 4).

98 While inflation in the minor allele count is observed for individuals with either lowly or highly  
99 ranked methylation values for all MAF classes, for the rare variants ( $MAF < 0.001$  and  
100  $0.001 < MAF < 0.01$ ) we see that the inflation is largely restricted to the extremes of the distribution.  
101 This is consistent with rare variants driving more extreme levels of DNAm.

### 102 *Enrichment in rare alleles in individuals with outlying DNA methylation*

103 We identified outlying DNAm levels at individual methylation probes using the subset of 642  
104 individuals in the LBC dataset who have DNAm measurements at a minimum of three time-points. At  
105 a given time-point, an outlier was defined as a CpG-site in an individual with DNAm levels more than  
106 three times the interquartile range below the 1st quartile, or above the 3rd quartile at that CpG-site.  
107 We detected a total of 3,143,781 outliers in at least a single time-point of measurement (each  
108 individual can be outlying at multiple probes). Approximately 67% (309,114/459,309) of DNAm  
109 probes had at least one individual with outlying levels of DNAm. In addition, approximately 9% of  
110 the outliers at a CpG-site (281,311/3,143,781) were consistently outlying at that site across at least  
111 three time-points. The outlier burden (mean number of outliers per individual at a time-point [47])  
112 was 2212 (out of 459,309 probes  $\sim 0.5\%$ ), reducing to 168 ( $\sim 0.04\%$ ) when considering only those  
113 outliers stable across at least three time-points.

114 We observed an enrichment of  $\sim 1.2x$  the number of rare alleles (95% confidence intervals of  
115 [1.190, 1.222], [1.174, 1.193], and [1.157, 1.164] for variants with  $MAF < 0.001$ ,  $0.001 < MAF < 0.01$ , and  
116  $0.01 < MAF < 0.1$  respectively) within 1kb of the CpG-sites in individuals with outlying DNAm levels  
117 compared to individuals with non-outlying DNAm levels at all time-points (Figure 5). The enrichment  
118 in outliers remained statistically significant after removing the probes with a CpG-SNP (These probes  
119 may bias the enrichment as they will disrupt the methylation at the site which will likely result in  
120 outliers [48]). The enrichment of rare alleles in outliers compared to non-outliers stable across three  
121 to four time-points was larger ([1.356, 1.517], [1.363, 1.459], and [1.253, 1.288] in probes without a  
122 CpG-SNP, and [3.612, 3.994], [3.234, 3.4377], and [3.010, 3.083] in probes with a CpG-SNP for  
123 variants with  $MAF < 0.001$ ,  $0.001 < MAF < 0.01$ , and  $0.01 < MAF < 0.1$  respectively) relative to the  
124 transient outliers observed to be outlying at a single time-point ([1.025 1.058], [1.028 1.047], and  
125 [1.030 1.038] in probes without a CpG-SNP, and [1.098 1.182], [1.116 1.166], and [1.134 1.155] in  
126 probes with a CpG-SNP for variants with  $MAF < 0.001$ ,  $0.001 < MAF < 0.01$ , and  $0.01 < MAF < 0.1$   
127 respectively. Figure 6).

### 128 *Outliers in gene-expression and DNA methylation are shared between relatives*

129 Using the Brisbane Systems Genetics Study (BSGS) dataset [49] (n=595), which includes 67 MZ  
130 twin pairs, as well as many siblings and parent-offspring pairs with DNAm and gene expression array  
131 data, we detected a total of 1,481,297 outliers in DNAm levels (using the same definition of outliers  
132 as before), and 446,916 outliers in gene expression levels (using the definition of outliers as a gene  
133 expression probe in an individual with gene expression levels outside of 1.5x the interquartile range  
134 of the 1<sup>st</sup> or 3<sup>rd</sup> quartile).

135 We observed a linear relationship between the proportion of DNAm outliers ( $R^2=0.52$ ,  
136 slope=0.31, and  $p < 10^{-323}$ ) and gene expression outliers (Adjusted  $R^2=0.02$ , slope=0.03,  $p < 10^{-323}$ )  
137 shared between each pair of individuals, and their pedigree relatedness (Figure 7). This is consistent  
138 with genetic effects underlying outlying levels of DNAm levels, as well as gene expression levels

139 across the genome. However, there was very little overlap between gene expression outliers and  
140 DNAm outliers, with 6.1% of individuals with a gene expression outlier also having a DNAm outlier at  
141 the nearest annotated gene.

### 142 *Outlying levels of DNA methylation are associated with a change in gene-expression*

143 Although the overlap of outlying DNAm and gene expression was not substantial, we tested  
144 whether the outlying DNAm levels correlates with any change in gene expression levels. For  
145 individuals with outlying levels of DNAm at a CpG-site, if the DNAm levels have no effect on gene  
146 expression levels, we would expect those individuals to be uniformly distributed across the gene  
147 expression distributions. Firstly, we paired DNAm probes to gene expression probes using significant  
148 common variant co-localisation established using a summary data-based Mendelian randomisation  
149 (SMR) study [24]. The rank of gene expression levels for individuals with outlying methylation levels  
150 at SMR-linked probes showed significant deviance from the uniform distribution (Kolmogorov-  
151 Smirnov one sample test  $D=0.03$ ,  $p<10^{-323}$ , Figure 8), indicating an association between outlying  
152 levels of DNAm levels on gene expression levels.

153 Secondly, we relaxed the criteria for linked DNAm and gene expression probes, using a distance-  
154 based pairing, taking all probe pairs within 10kb of each other. This introduced more noise into the  
155 analysis as not all DNAm and gene expression probes will be linked in any way. However, we still  
156 observed a significant deviation from the uniform distribution (Kolmogorov-Smirnov one sample test  
157  $D=0.006$ ,  $p<10^{-323}$ , Figure 9). These results correspond to a correlation between outlying levels of  
158 DNAm and a change in gene expression levels at the relevant genes.

### 159 *Discussion*

160 This study examined the links between DNAm levels, rare genetic variants, and gene expression  
161 levels across the genome. We combined multiple lines of evidence to demonstrate the role of rare



162 variants in outlying DNAm levels. Outlying levels of DNAm are further demonstrated to be associated  
163 with gene expression levels at nearby genes.

164 We examined the patterns of effects from common and rare genetic variants, within 1kb of the  
165 CpG-site, on DNAm levels across the genome. We found that rare alleles were associated with  
166 extreme levels of DNAm. In addition, we observed a significant enrichment of rare alleles within 1kb  
167 of CpG-sites in individuals with outlying levels of DNAm compared to individuals with normal DNAm  
168 levels at that CpG-site. Our results suggest that, in addition to common variants, rare variants also  
169 play a role in the control of DNAm levels across the genome.

170 DNAm levels at many CpG-sites are known to be correlated with age [23, 50], and changes in  
171 environment are also known to have an effect across time [16-18]. In our analysis, we found that  
172 outliers in DNAm levels which are present at only one time-point had almost no enrichment for rare  
173 alleles within 1kb of the CpG-site compared to non-outliers, but those probes outlying across  
174 multiple time-points within an individual had significant enrichment. This result suggests that  
175 transient outliers detected at a single time-point ( $2586888/3134194 \approx 83\%$  of the outliers in our  
176 study) are likely caused by environmental effects or measurement error, but the outliers stable  
177 across time are more likely to have an underlying genetic cause. This genetic effect underlying  
178 outliers in DNAm was confirmed using a family study design in an independent dataset. This is  
179 consistent with previous observations made using the LBC dataset in Shah et al. [51] who noted that  
180 many CpG-sites across the genome had stable DNA methylation across the lifetime, and these  
181 results are also in concordance with the observation made by Gaunt et al. [19] that the majority of  
182 mQTL are stable across time.

183 Similar to aggregation tests, we looked at enrichments and not associations with individual  
184 variants (which would be difficult to detect due to the power needed to reach statistical significance)  
185 we cannot say which variants have an effect and which do not. Notwithstanding, only a single rare  
186 variant (MAF<0.01) was observed within 1kb of the CpG-site in over 19% (25,591/131,903) of the

187 outliers that were stable across time and had no CpG-SNP. However, even in these cases of only one  
188 rare allele within 1kb, we cannot determine causality without functional experiments.

189 Previous studies have found correlations between DNAm and gene expression, and an overlap in  
190 the association of common genetic variants between them [14, 21, 41, 52-55]. In this study, we  
191 show that outliers in DNAm levels are associated with a change in gene expression levels at nearby  
192 genes. Summary-data based Mendelian randomisation [56] analyses have provided us with evidence  
193 of pleiotropic effects of common variants on DNAm and gene expression levels across the genome  
194 [22, 24]. In addition, the proportion of phenotypic variance explained by the lead variant at a mQTL  
195 was, on average, larger than the phenotypic variance explained by the same variant at a co-localised  
196 eQTL and at a co-localised higher-order complex trait QTL, such as height [24]. This attenuation in  
197 effect size of the variant at each step suggests a mechanism of effect from genetic variant to DNAm,  
198 to gene expression, to higher-order complex trait. In this study, we observed that large differences  
199 in DNAm often corresponded to smaller differences in gene expression, which would fit into this  
200 hypothesised directional mechanism of effect. In addition, the difference in slope in Figure 7 also  
201 suggests a larger effect from genetic variation on DNAm levels, than gene expression levels. This  
202 mechanism may be important to consider, as DNAm has been shown to be associated with many  
203 common diseases [11], and as methylation outliers are relatively easy to detect, it could provide a  
204 useful tool for future research.

205 A limitation of our study was that of the two data sets available to us, one (LBC) had WGS and  
206 DNAm array data, whereas the other (BSGS) had SNP array, DNAm array and gene expression array  
207 data. Ideally the study would be conducted on a cohort with all data types. With the increasing  
208 availability of whole genome sequence data, as well as RNA-seq and DNAm array/bisulfite sequence  
209 data, a more comprehensive study of the effects of rare variants on both DNAm and gene expression  
210 would provide a better understanding of the mechanisms underlying genetic effects on complex  
211 traits. Other epigenetic mechanisms, such as histone tail modifications, are highly correlated with

212 DNAm levels, are under shared genetic control [14, 21], and are also involved in the regulation of  
213 gene expression [54, 57]. We hypothesise that other epigenetic modifications may also show similar  
214 patterns of effects to what we found in DNAm, and including these into future analyses could  
215 potentially provide a more complete picture of the shared genetic control between DNAm, other  
216 epigenetic modifications, and gene expression.

217 In summary, this study provides a novel insight into the effect of rare variants on DNAm levels  
218 across the genome, and shows that extreme differences in DNAm are associated with gene  
219 expression levels at nearby genes, which may be driven by rare genetic variation.

## 220 Methods

### 221 Lothian Birth Cohorts of 1921 and 1936

222 The Lothian Birth Cohorts of 1921 and 1936 (LBC) [46] are part of a longitudinal study of  
223 cognitive ageing. DNA was extracted from whole blood samples from which DNAm levels were  
224 measured using the Illumina HumanMethylation450 BeadChip array across three or four time-  
225 points. The raw intensity data were background corrected, corrected for cell-type and quantile  
226 normalised using standard QC protocols, and the DNAm beta-values were generated using the R  
227 package *meffil* [58].

228 DNAm levels were measured at an average age (sd) of 79.1 (0.6), 86.7 (0.4), and 90.2 (0.1) years  
229 in the LBC1921 cohort and ages 69.6 (0.8), 72.5 (0.7), 76.3 (0.7), and 79.3 (0.6) years in the LBC1936.  
230 Of the 1342 individuals with DNAm measured at one point, 642 had at least three timepoint  
231 measurements. While DNAm levels across the genome are known to change with age [23, 50], this is  
232 not a confounding factor in our analysis as the age ranges within each wave of measurement are  
233 very narrow (mean standard deviation of age for each cohort in each wave was 0.6 years).

234 Whole genome sequencing was performed on the HiSeq X with an average coverage of 36x  
235 (minimum 19.6x, maximum 65.9x). Details of the QC can be found in Prendergast et al. 2019 [59].  
236 Briefly, reads were mapped using BWA [60] to the build 38 of the reference genome, and GATK [61]  
237 was used for variant calling. Variant effect predictor (VEP) [62] was used to annotate variants and  
238 gene models from the version 85 release of Ensembl.

### 239 Brisbane Systems Genetics Study

240 The Brisbane Systems Genetics study (BSGS) [49] was a dataset designed to study the genetic  
241 effects on gene expression, and the role of gene regulation in complex traits. DNAm levels were  
242 measured, in whole blood using the Illumina Infinium HumanMethylation450 BeadChip array, on  
243 614 individuals from 117 families, including monozygotic twin pairs, dizygotic twin pairs, sibling

244 pairs, and parents. The QC of the DNAm data was performed using the same pipeline as with the LBC  
245 data. gene expression levels were measured in whole blood on 846 individuals using the Illumina  
246 HumanHT-12 v4.0 BeadChip array. The QC of the gene expression data are detailed in Lloyd-Jones et  
247 al. 2017 [63]. Briefly, the gene expression levels were normalised using variance stabilization [64],  
248 quantile normalised using the *limma* software [65], followed by PEER factor adjustment [66], with 50  
249 factors, correcting for covariates such as age, sex, cell counts, and batch effects. Both DNAm and  
250 gene expression levels were measured on a total of 595 individuals.

251 An overview of the methods used to investigate the effects of genetic variants on DNAm levels  
252 and gene expression levels using the LBC and BSGS datasets are shown in Figure 1.

### 253 *Detecting genome-wide effects on DNAm*

254 Following similar procedures to Zhao et al. [39], and Kremling et al. [40], we ranked the  
255 individuals in the LBC data at each DNAm probe from lowest DNAm beta-value to the highest, and  
256 counted the number of minor alleles within 1kb of the CpG-site for each individual. We averaged this  
257 value at each rank across all autosomal probes to get the mean number of minor alleles within 1kb  
258 of a CpG-site. We did this for 4 MAF ranges,  $MAF > 0.1$ ,  $0.1 > MAF > 0.01$ ,  $0.01 > MAF > 0.001$ , and  
259  $0.001 > MAF$ , which allowed us to separate the effects of common and rare variants. The rarest MAF  
260 bin ( $MAF < 0.001$ ) corresponded to variants with one or two observed minor alleles in our dataset.  
261 This analysis was performed using the 1<sup>st</sup> wave of measurements in the LBC dataset to maximise  
262 sample size.

### 263 *Detecting outliers*

264 We defined DNAm outliers as a CpG-site in an individual with DNAm levels outside 3  
265 interquartile ranges (IQRs) from the 1<sup>st</sup> quartile (Q1) or the 3<sup>rd</sup> quartile (Q3) of the DNAm levels at  
266 that CpG-site. The standard 1.5 IQRs from Q1 or Q3 compares to 3 standard deviation from the  
267 mean in a perfectly normal distribution. Our definition is slightly more stringent than this, as the

268 distribution of DNAm levels can be highly skewed. For detecting outliers in the gene expression data,  
269 which had more symmetric distributions, the standard 1.5 IQR from Q1 and Q3 definition was used.

### 270 Enrichment of rare alleles around CpG-sites

271 We defined enrichment as,

$$272 \text{ Enrichment} = \frac{P\left(\begin{array}{c|c} \text{individuals with minor} & \text{individual is} \\ \text{allele within 1kb} & \text{an outlier} \end{array}\right)}{P\left(\begin{array}{c|c} \text{individuals with minor} & \text{individual is not} \\ \text{allele within 1kb} & \text{an outlier at} \\ & \text{any time-point} \end{array}\right)}$$

273 In words, we defined enrichment as the probability of an individual having a minor allele within  
274 1kb of a CpG-site given they have outlying DNAm levels at that site, divided by the probability of an  
275 individual having a minor allele within 1kb of a CpG-site given they don't have outlying DNAm levels  
276 at that site. This is similar to the definition used in Li et al. [27], although they used a slightly  
277 different definition of outliers (>2 standard deviations from the mean).

### 278 Proportion of outliers shared

279 To compute the proportion of outliers shared between each pair of individuals, we used the  
280 formula  $\frac{2n_{12}}{n_1+n_2}$ , where  $n_1$  is the number of outliers for individual one,  $n_2$  is the number of outliers for  
281 individual two, and  $n_{12}$  is the number of outliers shared between the individuals. The relatedness  
282 coefficients were obtained from pedigree data.

### 283 Testing for association between outlying levels of DNAm and gene expression

284 To test for an association between outlying levels of DNAm and gene expression, the percentile  
285 in the gene expression levels distribution at a gene expression probe was calculated for each  
286 individual with outlying DNAm levels at the paired DNAm probe. We used two methods to pair  
287 DNAm probes to gene expression probes. Firstly, we linked DNAm probes through a shared common  
288 variant co-localisation with the gene expression probe detected using the Summary-data based  
289 Mendelian Randomisation (SMR) method [24, 56]. We also used all pairings of gene expression

290 probes within 10kb of the CpG-sites. This represents a trade-off between number of pairs included in  
291 the analysis and including pairs of gene expression and DNAm probes that have no biological  
292 connection beyond proximity. Under the null hypothesis of no association between outlying DNAm  
293 and gene expression levels, the rank of gene expression levels for individuals with outlying DNAm  
294 levels should be uniformly distributed. We tested for deviation from the uniform distribution using  
295 the Kolmogorov-Smirnov one sample test [67], which tests the degree of agreement between the  
296 sampled values and a theoretical distribution, in our case the uniform distribution.

297

## 298 References

- 299 1. Bird, A., *DNA methylation patterns and epigenetic memory*. *Genes Dev*, 2002. **16**(1):  
300 p. 6-21.
- 301 2. Fan, S. and X. Zhang, *CpG island methylation pattern in different human tissues and*  
302 *its correlation with gene expression*. *Biochem Biophys Res Commun*, 2009. **383**(4): p.  
303 421-5.
- 304 3. Jaenisch, R. and A. Bird, *Epigenetic regulation of gene expression: how the genome*  
305 *integrates intrinsic and environmental signals*. *Nature Genetics*, 2003. **33**: p. 245.
- 306 4. Li, E., C. Beard, and R. Jaenisch, *Role for DNA methylation in genomic imprinting*.  
307 *Nature*, 1993. **366**(6453): p. 362-365.
- 308 5. Riggs, A.D., *X inactivation, differentiation, and DNA methylation*. *Cytogenetic and*  
309 *Genome Research*, 1975. **14**(1): p. 9-25.
- 310 6. Laurent, L., et al., *Dynamic changes in the human methylome during differentiation*.  
311 *Genome research*, 2010. **20**(3): p. 320-331.
- 312 7. Lister, R., et al., *Human DNA methylomes at base resolution show widespread*  
313 *epigenomic differences*. *Nature*, 2009. **462**(7271): p. 315-322.
- 314 8. Smith, Z.D. and A. Meissner, *DNA methylation: roles in mammalian development*.  
315 *Nat Rev Genet*, 2013. **14**(3): p. 204-20.
- 316 9. Klutstein, M., et al., *DNA Methylation in Cancer and Aging*. *Cancer Research*, 2016.  
317 **76**(12): p. 3446.
- 318 10. Feinberg, A.P., M.A. Koldobskiy, and A. Göndör, *Epigenetic modulators, modifiers*  
319 *and mediators in cancer aetiology and progression*. *Nature Reviews Genetics*, 2016.  
320 **17**(5): p. 284.
- 321 11. Jin, Z. and Y. Liu, *DNA methylation in human diseases*. *Genes & Diseases*, 2018. **5**(1):  
322 p. 1-8.
- 323 12. Feng, Y., J. Jankovic, and Y.-C. Wu, *Epigenetic mechanisms in Parkinson's disease*.  
324 *Journal of the Neurological Sciences*, 2015. **349**(1): p. 3-9.
- 325 13. Liu, Y., et al., *Epigenome-wide association data implicate DNA methylation as an*  
326 *intermediary of genetic risk in rheumatoid arthritis*. *Nature Biotechnology*, 2013. **31**:  
327 p. 142.
- 328 14. Banovich, N.E., et al., *Methylation QTLs are associated with coordinated changes in*  
329 *transcription factor binding, histone modifications, and gene expression levels*. *PLoS*  
330 *Genet*, 2014. **10**(9): p. e1004663.
- 331 15. McRae, A.F., et al., *Contribution of genetic variation to transgenerational inheritance*  
332 *of DNA methylation*. *Genome Biology*, 2014. **15**(5): p. R73.
- 333 16. Downen, R.H., et al., *Widespread dynamic DNA methylation in response to biotic*  
334 *stress*. *Proceedings of the National Academy of Sciences*, 2012. **109**(32): p. E2183.
- 335 17. Garg, P., et al., *A survey of inter-individual variation in DNA methylation identifies*  
336 *environmentally responsive co-regulated networks of epigenetic variation in the*  
337 *human genome*. *PLOS Genetics*, 2018. **14**(10): p. e1007707.
- 338 18. Christensen, B.C., et al., *Aging and Environmental Exposures Alter Tissue-Specific*  
339 *DNA Methylation Dependent upon CpG Island Context*. *PLOS Genetics*, 2009. **5**(8): p.  
340 e1000602.
- 341 19. Gaunt, T.R., et al., *Systematic identification of genetic influences on methylation*  
342 *across the human life course*. *Genome Biology*, 2016. **17**(1): p. 61.



- 343 20. McRae, A.F., et al., *Identification of 55,000 Replicated DNA Methylation QTL*. Sci Rep,  
344 2018. **8**(1): p. 17605.
- 345 21. Bell, J.T., et al., *DNA methylation patterns associate with genetic and gene expression*  
346 *variation in HapMap cell lines*. Genome Biol, 2011. **12**(1): p. R10.
- 347 22. Hannon, E., et al., *Leveraging DNA-Methylation Quantitative-Trait Loci to*  
348 *Characterize the Relationship between Methylomic Variation, Gene Expression, and*  
349 *Complex Traits*. Am J Hum Genet, 2018. **103**(5): p. 654-665.
- 350 23. Bell, J.T., et al., *Epigenome-Wide Scans Identify Differentially Methylated Regions for*  
351 *Age and Age-Related Phenotypes in a Healthy Ageing Population*. PLOS Genetics,  
352 2012. **8**(4): p. e1002629.
- 353 24. Wu, Y., et al., *Integrative analysis of omics summary data reveals putative*  
354 *mechanisms underlying complex traits*. Nat Commun, 2018. **9**(1): p. 918.
- 355 25. Bomba, L., K. Walter, and N. Soranzo, *The impact of rare and low-frequency genetic*  
356 *variants in common disease*. Genome Biol, 2017. **18**(1): p. 77.
- 357 26. Hernandez, R.D., et al., *Ultrarare variants drive substantial cis heritability of human*  
358 *gene expression*. Nature Genetics, 2019. **51**(9): p. 1349-1355.
- 359 27. Li, X., et al., *The impact of rare variation on gene expression across tissues*. Nature,  
360 2017. **550**(7675): p. 239-243.
- 361 28. Marouli, E., et al., *Rare and low-frequency coding variants alter human adult height*.  
362 Nature, 2017. **542**(7640): p. 186-190.
- 363 29. Visscher, P.M., et al., *10 Years of GWAS Discovery: Biology, Function, and*  
364 *Translation*. Am J Hum Genet, 2017. **101**(1): p. 5-22.
- 365 30. Lee, S., et al., *Rare-variant association analysis: study designs and statistical tests*.  
366 Am J Hum Genet, 2014. **95**(1): p. 5-23.
- 367 31. Asimit, J.L., et al., *ARIEL and AMELIA: Testing for an Accumulation of Rare Variants*  
368 *Using Next-Generation Sequencing Data*. Human Heredity, 2012. **73**(2): p. 84-94.
- 369 32. Lee, S., M.C. Wu, and X. Lin, *Optimal tests for rare variant effects in sequencing*  
370 *association studies*. Biostatistics, 2012. **13**(4): p. 762-75.
- 371 33. Li, B. and S.M. Leal, *Methods for detecting associations with rare variants for*  
372 *common diseases: application to analysis of sequence data*. Am J Hum Genet, 2008.  
373 **83**(3): p. 311-21.
- 374 34. Morgenthaler, S. and W.G. Thilly, *A strategy to discover genes that carry multi-allelic*  
375 *or mono-allelic risk for common diseases: A cohort allelic sums test (CAST)*. Mutation  
376 Research/Fundamental and Molecular Mechanisms of Mutagenesis, 2007. **615**(1): p.  
377 28-56.
- 378 35. Neale, B.M., et al., *Testing for an unusual distribution of rare variants*. PLoS Genet,  
379 2011. **7**(3): p. e1001322.
- 380 36. Price, A.L., et al., *Pooled Association Tests for Rare Variants in Exon-Resequencing*  
381 *Studies*. The American Journal of Human Genetics, 2010. **86**(6): p. 832-838.
- 382 37. Wu, M.C., et al., *Rare-variant association testing for sequencing data with the*  
383 *sequence kernel association test*. Am J Hum Genet, 2011. **89**(1): p. 82-93.
- 384 38. Richardson, T.G., et al., *Collapsed methylation quantitative trait loci analysis for low*  
385 *frequency and rare variants*. Hum Mol Genet, 2016. **25**(19): p. 4339-4349.
- 386 39. Zhao, J., et al., *A Burden of Rare Variants Associated with Extremes of Gene*  
387 *Expression in Human Peripheral Blood*. Am J Hum Genet, 2016. **98**(2): p. 299-309.
- 388 40. Kremling, K.A.G., et al., *Dysregulation of expression correlates with rare-allele burden*  
389 *and fitness loss in maize*. Nature, 2018. **555**(7697): p. 520-523.

- 390 41. Deaton, A.M. and A. Bird, *CpG islands and the regulation of transcription*. *Genes Dev*,  
391 2011. **25**(10): p. 1010-22.
- 392 42. He, J., et al., *C9orf72 hexanucleotide repeat expansions in Chinese sporadic*  
393 *amyotrophic lateral sclerosis*. *Neurobiology of Aging*, 2015. **36**(9): p. 2660.e1-  
394 2660.e8.
- 395 43. Paul, D.S., et al., *Increased DNA methylation variability in type 1 diabetes across*  
396 *three immune effector cell types*. *Nature Communications*, 2016. **7**: p. 13555.
- 397 44. Nachman, M.W. and S.L. Crowell, *Estimate of the Mutation Rate per Nucleotide in*  
398 *Humans*. *Genetics*, 2000. **156**(1): p. 297.
- 399 45. Cooper, D.N. and H. Youssoufian, *The CpG dinucleotide and human genetic disease*.  
400 *Human Genetics*, 1988. **78**(2): p. 151-155.
- 401 46. Taylor, A.M., A. Pattie, and I.J. Deary, *Cohort Profile Update: The Lothian Birth*  
402 *Cohorts of 1921 and 1936*. *Int J Epidemiol*, 2018. **47**(4): p. 1042-1042r.
- 403 47. Seeboth, A., et al., *DNA methylation outlier burden, health and ageing in Generation*  
404 *Scotland and the Lothian Birth Cohorts of 1921 and 1936*. *medRxiv*, 2019: p.  
405 19010728.
- 406 48. Shoemaker, R., et al., *Allele-specific methylation is prevalent and is contributed by*  
407 *CpG-SNPs in the human genome*. *Genome Res*, 2010. **20**(7): p. 883-9.
- 408 49. Powell, J.E., et al., *The Brisbane Systems Genetics Study: genetical genomics meets*  
409 *complex trait genetics*. *PLoS One*, 2012. **7**(4): p. e35430.
- 410 50. Boks, M.P., et al., *The relationship of DNA methylation with age, gender and*  
411 *genotype in twins and healthy controls*. *PLoS One*, 2009. **4**(8): p. e6767.
- 412 51. Shah, S., et al., *Genetic and environmental exposures constrain epigenetic drift over*  
413 *the human life course*. *Genome Research*, 2014. **24**(11): p. 1725-1733.
- 414 52. Lea, A.J., et al., *Genome-wide quantification of the effects of DNA methylation on*  
415 *human gene regulation*. *eLife*, 2018. **7**: p. e37513.
- 416 53. Portela, A. and M. Esteller, *Epigenetic modifications and human disease*. *Nat*  
417 *Biotechnol*, 2010. **28**(10): p. 1057-68.
- 418 54. The ENCODE Project Consortium, *An integrated encyclopedia of DNA elements in the*  
419 *human genome*. *Nature*, 2012. **489**(7414): p. 57-74.
- 420 55. Ball, M.P., et al., *Targeted and genome-scale strategies reveal gene-body*  
421 *methylation signatures in human cells*. *Nature Biotechnology*, 2009. **27**: p. 361.
- 422 56. Zhu, Z., et al., *Integration of summary data from GWAS and eQTL studies predicts*  
423 *complex trait gene targets*. *Nat Genet*, 2016. **48**(5): p. 481-7.
- 424 57. Roadmap Epigenomics Consortium, et al., *Integrative analysis of 111 reference*  
425 *human epigenomes*. *Nature*, 2015. **518**(7539): p. 317-30.
- 426 58. Min, J.L., et al., *Meffil: efficient normalization and analysis of very large DNA*  
427 *methylation datasets*. *Bioinformatics*, 2018.
- 428 59. Prendergast, J.G.D., et al., *Linked Mutations at Adjacent Nucleotides Have Shaped*  
429 *Human Population Differentiation and Protein Evolution*. *Genome Biology and*  
430 *Evolution*, 2019. **11**(3): p. 759-775.
- 431 60. Li, H. and R. Durbin, *Fast and accurate short read alignment with Burrows-Wheeler*  
432 *transform*. *Bioinformatics*, 2009. **25**(14): p. 1754-60.
- 433 61. DePristo, M.A., et al., *A framework for variation discovery and genotyping using*  
434 *next-generation DNA sequencing data*. *Nat Genet*, 2011. **43**(5): p. 491-8.
- 435 62. McLaren, W., et al., *The Ensembl Variant Effect Predictor*. *Genome Biol*, 2016. **17**(1):  
436 p. 122.

- 437 63. Lloyd-Jones, L.R., et al., *The Genetic Architecture of Gene Expression in Peripheral*  
438 *Blood*. Am J Hum Genet, 2017. **100**(2): p. 228-237.
- 439 64. Huber, W., et al., *Variance stabilization applied to microarray data calibration and to*  
440 *the quantification of differential expression*. Bioinformatics, 2002. **18 Suppl 1**: p. S96-  
441 104.
- 442 65. Ritchie, M.E., et al., *limma powers differential expression analyses for RNA-*  
443 *sequencing and microarray studies*. Nucleic Acids Res, 2015. **43**(7): p. e47.
- 444 66. Stegle, O., et al., *Using probabilistic estimation of expression residuals (PEER) to*  
445 *obtain increased power and interpretability of gene expression analyses*. Nat Protoc,  
446 2012. **7**(3): p. 500-7.
- 447 67. Massey, F.J., *The Kolmogorov-Smirnov Test for Goodness of Fit*. Journal of the  
448 American Statistical Association, 1951. **46**(253): p. 68-78.

449

450

451 **Figures**

452

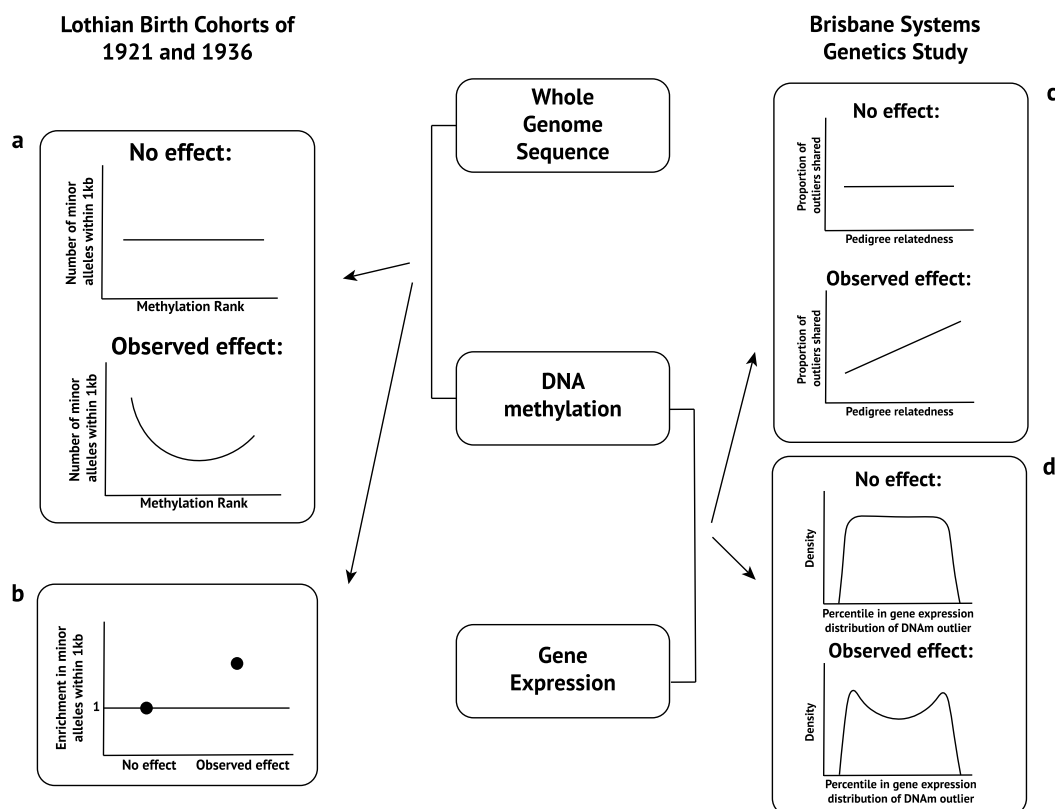

453

454 **Figure 1 – Overview of the methods used in this study.** The Lothian Birth Cohorts of 1921 and 1936 were used to  
 455 investigate the effect of genetic variants on DNA methylation levels, while the Brisbane Systems Genetics Study was used  
 456 to examine the effect of DNA methylation levels on gene expression levels. In subfigure a, the number of minor alleles  
 457 within 1kb is plotted against methylation rank (The individual with the  $n^{\text{th}}$  lowest DNAm levels will have a methylation rank  
 458 of  $n$  at that CpG-site); in the case of no effect of genetic variants on DNAm levels, a uniform distribution is expected, any  
 459 deviation from the uniform distribution is evidence for a genetic effect on DNAm levels. Subfigure b shows the enrichment  
 460 of minor alleles within 1kb in outliers compared to non-outliers; in the case of no effect of genetic variants on DNAm  
 461 outliers, the enrichment will be 1, any significant deviation from 1 is evidence of an effect of genetic variants on outliers of  
 462 DNAm. In subfigure b, the proportion of outliers shared between pairs is plotted against the pedigree relatedness; if there  
 463 is no genetic effect on DNAm outliers a slope of 0 is expected, any non-zero slope is evidence for a genetic effect on DNAm  
 464 outliers. Finally, in subfigure d, the distribution of gene expression percentile of individuals with DNAm outliers at nearby  
 465 probes is plotted; in the case of no effect from DNAm on gene expression, a uniform distribution is expected, any deviation  
 466 from the uniform distribution is evidence for an effect of DNAm on gene expression.

467

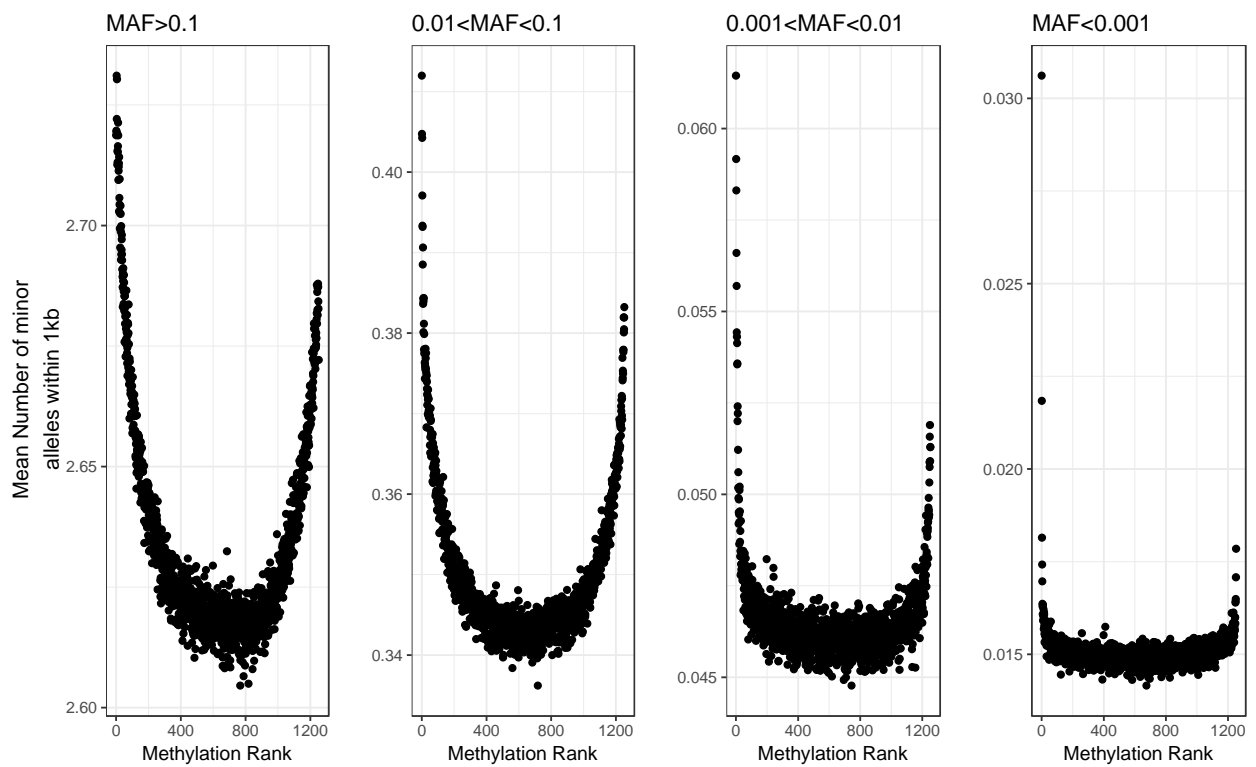

468

469 **Figure 2 – The mean number of minor alleles within 1kb of the CpG-site for each rank of DNAm levels across all**  
470 **autosomal probes.** The analysis is split into 4 MAF bins. The inflation at the lowest and highest ranks is seen in each MAF  
471 bin, demonstrating that common and rare alleles both have an effect on DNAm genome-wide.

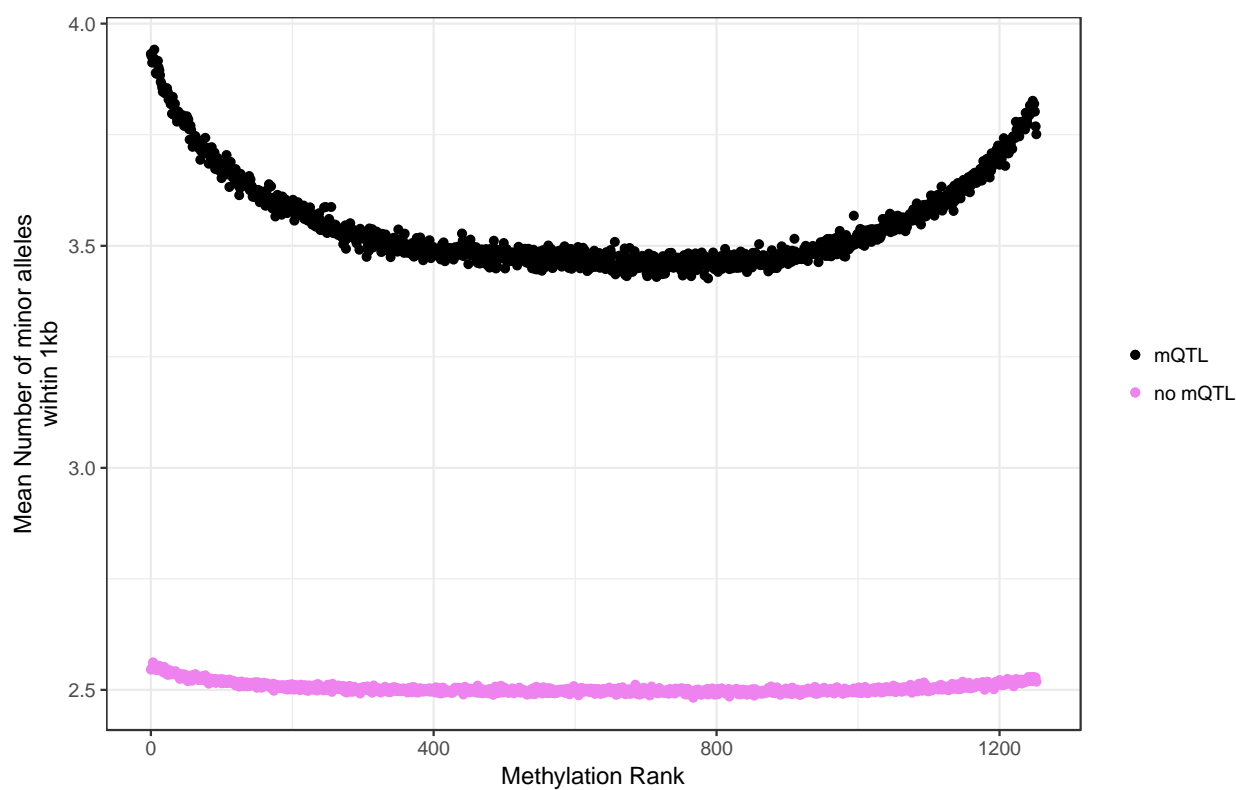

472

473 **Figure 3 – The effect of common genetic variants on DNAm is captured by mQTL analyses.** Separating the ~50000

474 probes with a known mQTL from the remaining probes for the common variants (MAF>0.1), we see the inflation at the

475 ends for the distribution is not as strong in the probes without an mQTL. There is also a mean difference of about 1 minor

476 allele within 1kb, which is consistent with a nearby mQTL.

477

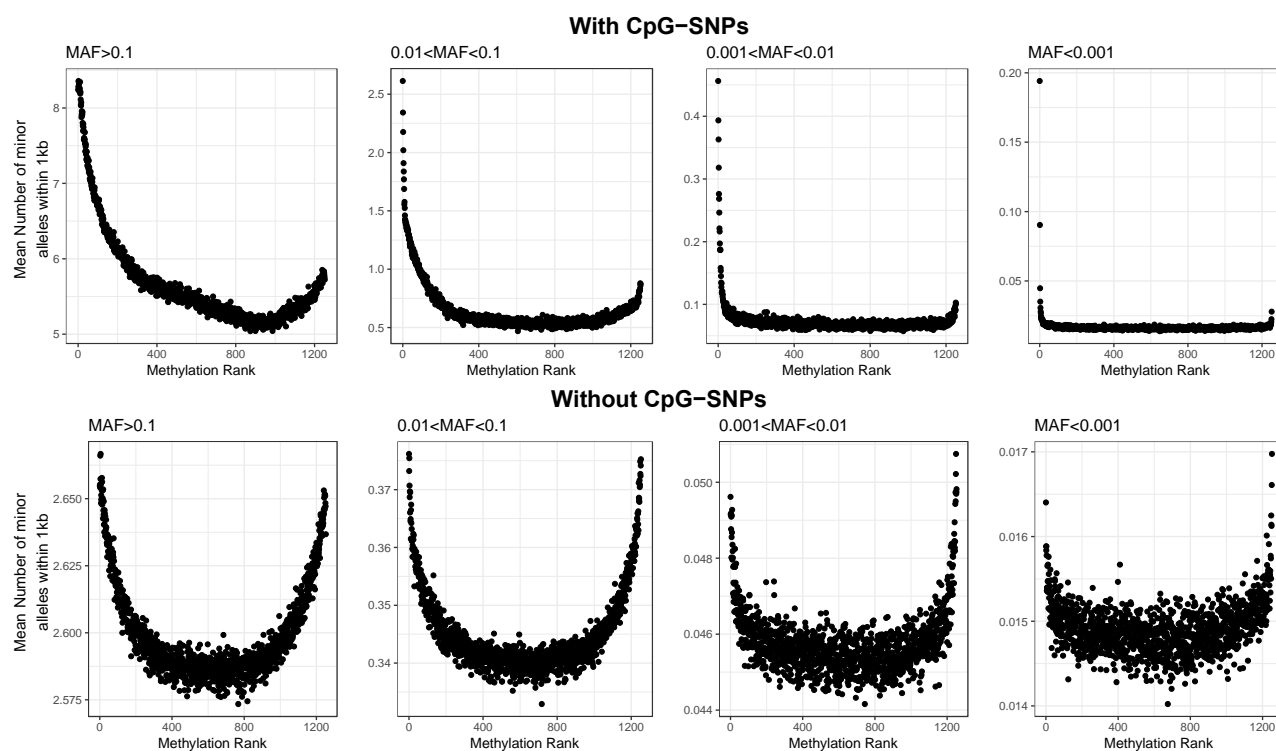

478

479 **Figure 4 – The mean number of minor alleles within 1kb of the CpG-site for each rank of DNAm levels across all**  
480 **autosomal probes with and without a CpG-SNP.** The effects of CpG-SNPs were observed to reduce DNAm levels on  
481 average. On the other hand, the effects of SNP not at the CpG-site were observed to be symmetrical. This suggests that  
482 genetic effects outside the CpG-site are equally likely to increase or decrease DNAm levels.

483

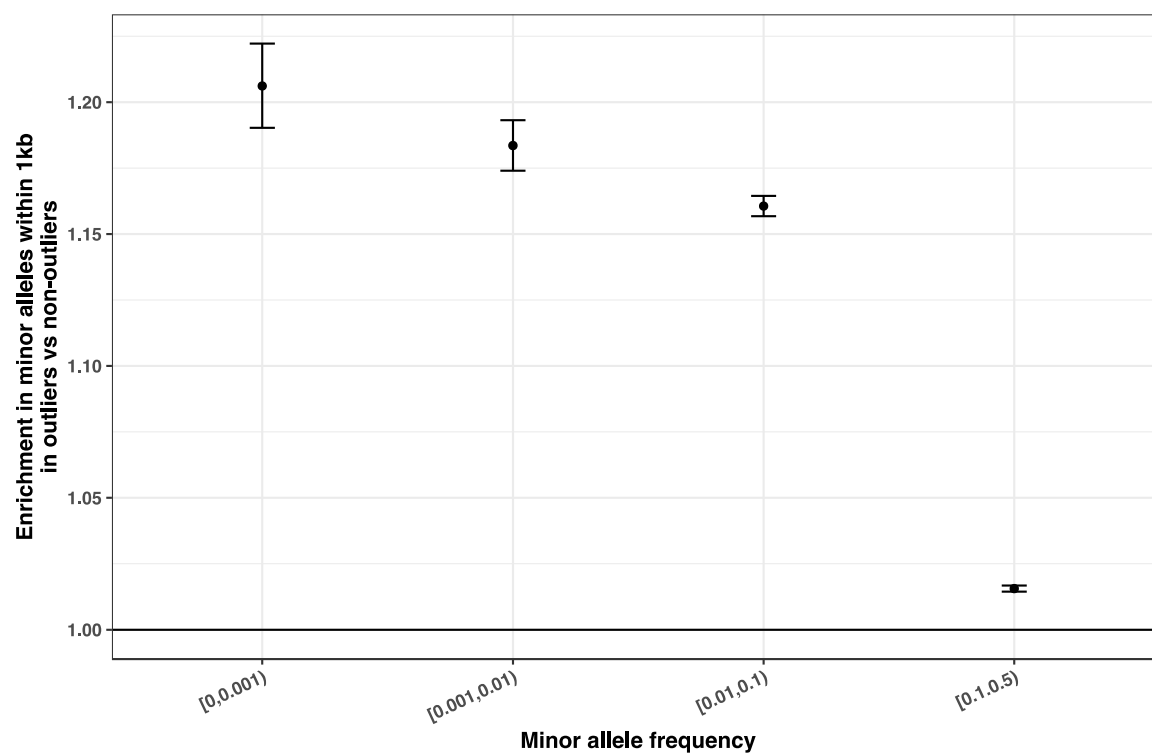

484

485 **Figure 5 – Outliers are enriched in rare alleles within 1kb of the CpG-site.** The enrichment of minor alleles within 1kb  
486 of the CpG-site for individuals with outlying levels of DNAm levels compared to individuals with non-outlying levels of  
487 DNAm was significant for all minor allele frequency (MAF) groups.

488



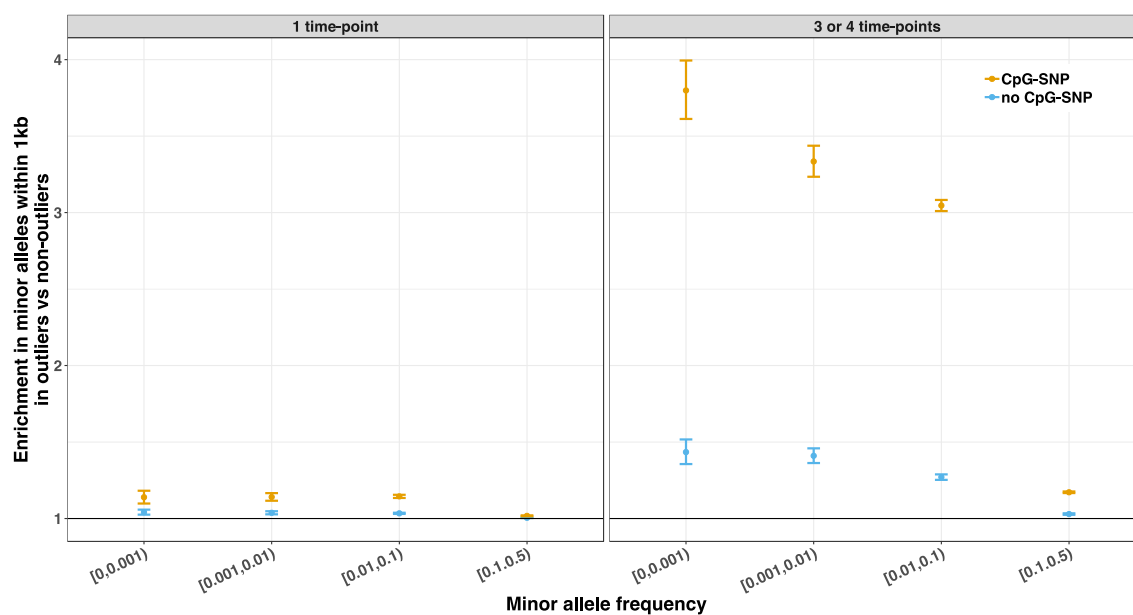

489

490 **Figure 6 – The enrichment of minor alleles in outliers compared to non-outliers at probes with and without a CpG-**

491 **SNP.** The enrichment in common alleles is not significant when excluding the probes with a CpG-SNP. For rare alleles, the

492 enrichment in outliers remains significant in the individuals DNAm levels outlying stably across time, whereas the

493 enrichment in individuals with DNAm levels outlying at only a single time-point is not significant.

494

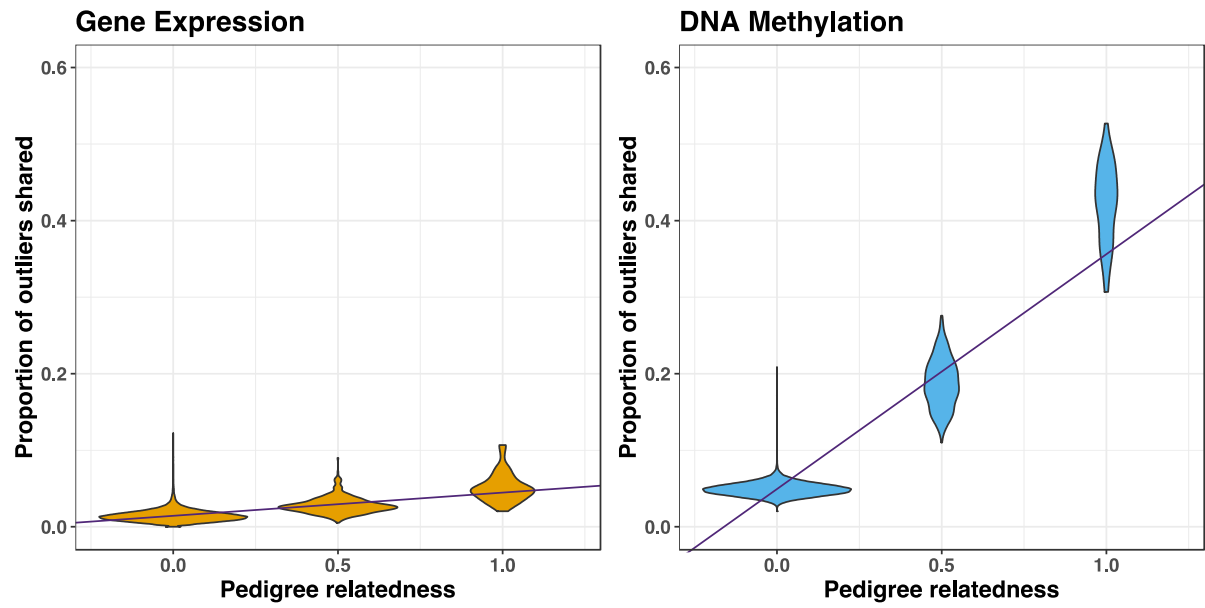

495

496

497

498

499

500

**Figure 7 – Outliers in DNAm, and gene expression are shared between relatives more often than at random. The linear relationship between pedigree relatedness and proportion of outliers shared suggests a genetic component to the outlying levels of DNAm and gene expression. The difference in slope suggests a stronger genetic effect on the DNAm levels compared to gene expression levels.**

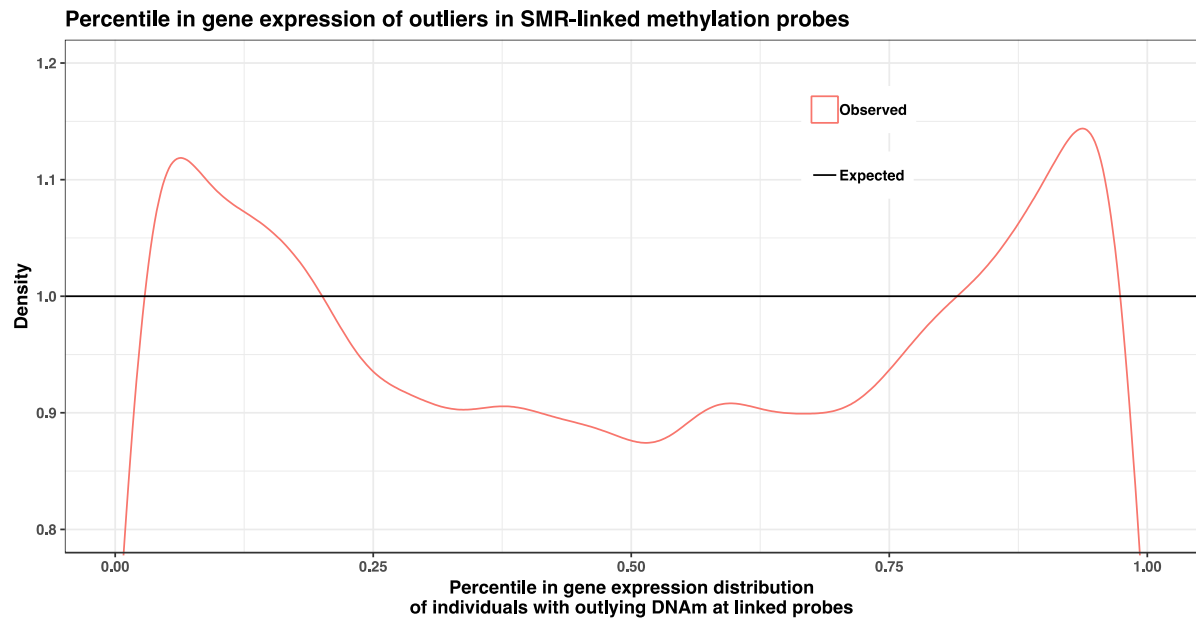

501

502

**Figure 8 – Density plot of the percentile in the gene expression distribution of individuals with outlying DNAm**

503

**levels at a linked DNAm probe.** Taking all DNAm and gene expression probe pairs linked through a summary-data based

504

Mendelian randomisation analysis, we observe a significant deviation from the uniform distribution (Kolmogorov-Smirnov

505

one sample test  $D=0.03$  and  $p < 10^{-323}$ ), suggesting that outlying levels of DNAm are associated with a change in the gene

506

expression levels.

507

508

509

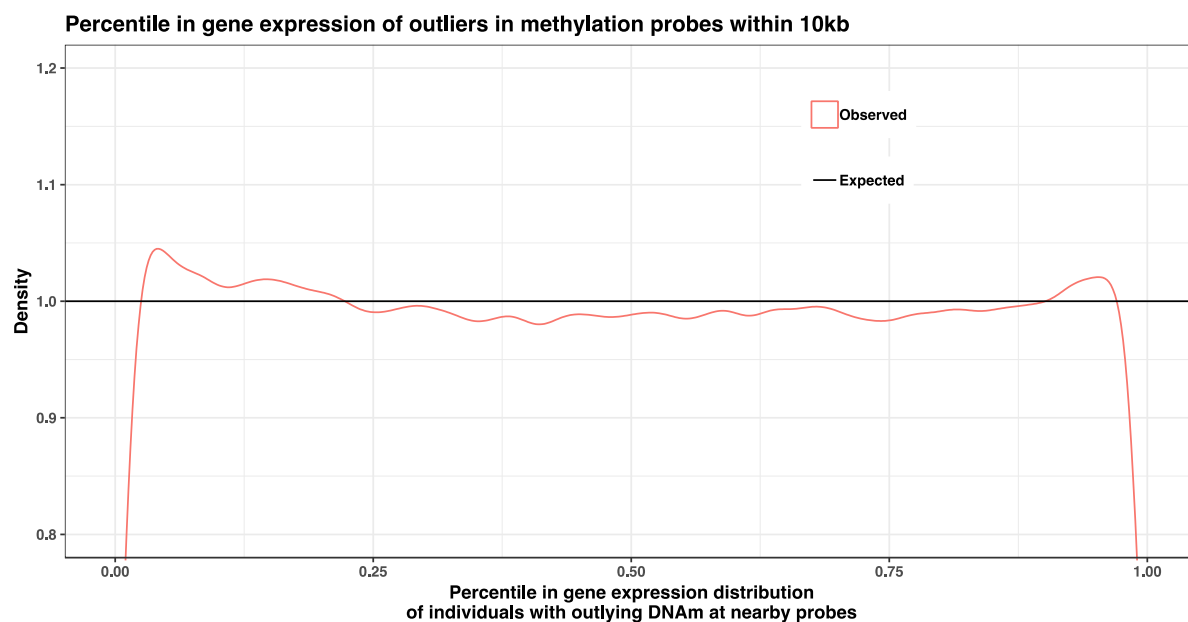

510

511 **Figure 9 – Density plot of the percentile in the gene expression distribution of individuals with outlying DNAm**

512 **levels at a DNAm probe within 10kb.** Taking all individuals with outlying DNAm levels at DNAm probes within 10kb of a

513 gene expression probe, we observe which percentile they lie in the gene expression

514 probe. We observe a significant deviation from the uniform distribution (Kolmogorov-Smirnov one sample test  $D=0.006$

515 and  $p < 10^{-323}$ ), suggesting that outlying levels of DNAm are associated with a change in the gene expression levels.

516
